# Supplementary material for: Confinement induced conformational changes in n-alkanes sequestered within a narrow carbon nanotube
Source: Royal Society of Chemistry journal article supplement (doi:10.1039/c2cp22940d), 2012-01-01
Supplement: c2cp22940d.pdf [file c2cp22940d.pdf]

**Supplementary Information for**

**Confinement induced conformational changes in *n*-alkanes sequestered within a  
narrow carbon nanotube**

Piyush P. Wanjari, Ashish V. Sangwai, and Henry S. Ashbaugh

Department of Chemical and Biomolecular Engineering, Tulane University, New  
Orleans, LA 70118

Here we provide optimized coordinates (x, y, and z), partial charges, and Lennard-Jones interaction parameters for the carbon nanotube, alkanes, and benzene simulated in our study of confinement induced conformational changes in the alkanes. Lennard-Jones, bond-stretching, bond-bending, and dihedral torsional interactions for the organic molecules were modeled using the Generalized Amber Force Field. <sup>1</sup>Gaussian03 *ab initio* calculations were performed using the B3LYP hybrid-functional and 6-31G\* basis set to optimize the *n*-alkanes and benzene geometries.<sup>2</sup> Carbon and hydrogen partial charges were subsequently evaluated from the Gaussian output files using the RED-II implementation of the restrained electrostatic potential method.<sup>3</sup> The Antechamber module from the AMBER 9 simulation package was used to assign atomic partial charges to the carbon nanotube.<sup>4</sup> Water was modeled using the SPC/E potential.<sup>5</sup> Cross interactions between unlike atoms were determined using Lorentz-Berthelot combining rules.<sup>6</sup>

## 1. Lennard-Jones Interactions by Atom Type.

**Table S1.** Lennard-Jones intra-molecular interactions for simulated hydrocarbons listed by generalized Amber force field atom type.

| atom<br>type | $\sigma$ (Å) | $\epsilon$<br>(kcal/mol) |
|--------------|--------------|--------------------------|
| ca           | 1.9080       | 0.0860                   |
| ha           | 1.4590       | 0.0150                   |
| c3           | 1.9080       | 0.1094                   |
| hc           | 1.4870       | 0.0157                   |

## 2. (13,0) Carbon Nanotube

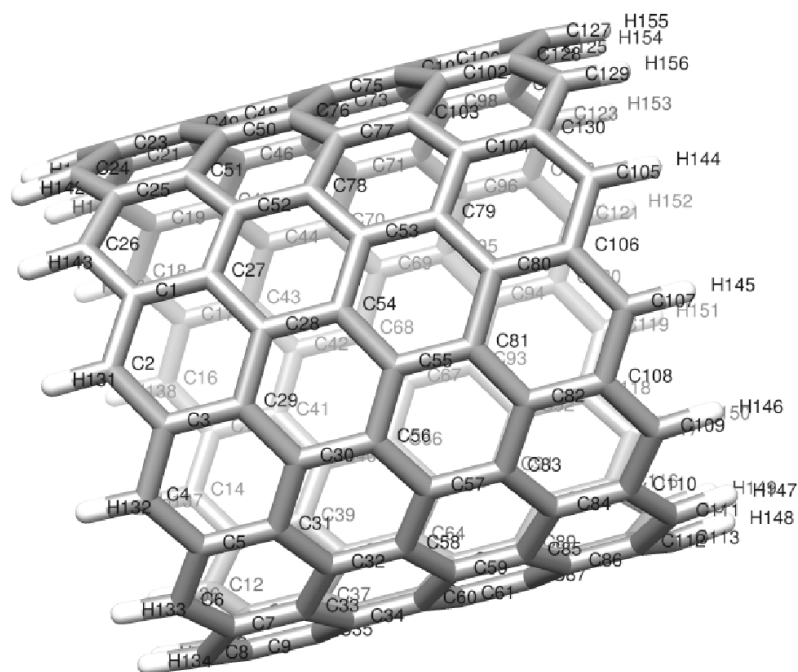

Figure S1. (13,0) Nanotube as simulated

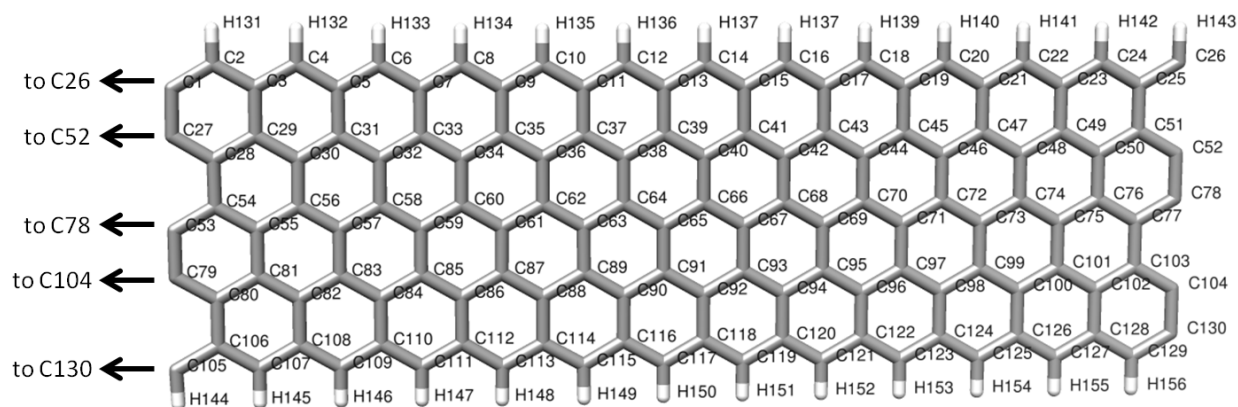

Figure S2. (13,0) nanotube unfurled for clarity.

**Table S2.** (13,0) nanotube x,y,z coordinates, partial charges, and atom types

| <b>atom name</b> | <b>x (Å)</b> | <b>y (Å)</b> | <b>z (Å)</b> | <b>partial charge</b> | <b>atom type</b> |
|------------------|--------------|--------------|--------------|-----------------------|------------------|
| C1               | 4.971        | 0.001        | 0.034        | -0.0062               | ca               |
| C2               | 4.830        | 1.191        | -0.663       | -0.1095               | ca               |
| C3               | 4.401        | 2.311        | 0.034        | -0.0333               | ca               |
| C4               | 3.723        | 3.300        | -0.662       | -0.0437               | ca               |
| C5               | 2.823        | 4.092        | 0.035        | -0.0639               | ca               |
| C6               | 1.763        | 4.652        | -0.662       | 0.0177                | ca               |
| C7               | 0.599        | 4.936        | 0.035        | -0.0841               | ca               |
| C8               | -0.601       | 4.939        | -0.661       | 0.0406                | ca               |
| C9               | -1.764       | 4.649        | 0.035        | -0.0823               | ca               |
| C10              | -2.827       | 4.094        | -0.661       | 0.0103                | ca               |
| C11              | -3.722       | 3.297        | 0.036        | -0.0596               | ca               |
| C12              | -4.405       | 2.312        | -0.661       | -0.0541               | ca               |
| C13              | -4.827       | 1.190        | 0.036        | -0.0287               | ca               |
| C14              | -4.975       | 0.000        | -0.661       | -0.1179               | ca               |
| C15              | -4.827       | -1.189       | 0.035        | -0.0029               | ca               |
| C16              | -4.404       | -2.311       | -0.662       | -0.1595               | ca               |
| C17              | -3.721       | -3.296       | 0.035        | 0.0120                | ca               |
| C18              | -2.825       | -4.093       | -0.662       | -0.1780               | ca               |
| C19              | -1.762       | -4.648       | 0.034        | 0.0177                | ca               |
| C20              | -0.599       | -4.938       | -0.663       | -0.1830               | ca               |
| C21              | 0.600        | -4.935       | 0.034        | 0.0188                | ca               |
| C22              | 1.764        | -4.651       | -0.663       | -0.1825               | ca               |
| C23              | 2.825        | -4.091       | 0.034        | 0.0171                | ca               |
| C24              | 3.724        | -3.298       | -0.663       | -0.1760               | ca               |
| C25              | 4.402        | -2.310       | 0.034        | 0.0102                | ca               |
| C26              | 4.830        | -1.190       | -0.663       | -0.1547               | ca               |
| C27              | 4.987        | 0.001        | 1.421        | -0.0087               | ca               |
| C28              | 4.842        | 1.194        | 2.115        | 0.0047                | ca               |
| C29              | 4.415        | 2.318        | 1.421        | -0.0272               | ca               |
| C30              | 3.733        | 3.307        | 2.116        | 0.0195                | ca               |
| C31              | 2.832        | 4.104        | 1.422        | -0.0471               | ca               |
| C32              | 1.768        | 4.663        | 2.116        | 0.0320                | ca               |
| C33              | 0.601        | 4.951        | 1.422        | -0.0601               | ca               |
| C34              | -0.601       | 4.951        | 2.116        | 0.0365                | ca               |
| C35              | -1.769       | 4.663        | 1.422        | -0.0589               | ca               |
| C36              | -2.833       | 4.105        | 2.117        | 0.0306                | ca               |

|     |        |        |       |         |    |
|-----|--------|--------|-------|---------|----|
| C37 | -3.733 | 3.307  | 1.423 | -0.0443 | ca |
| C38 | -4.416 | 2.318  | 2.117 | 0.0174  | ca |
| C39 | -4.842 | 1.193  | 1.423 | -0.0242 | ca |
| C40 | -4.987 | 0.000  | 2.117 | 0.0027  | ca |
| C41 | -4.841 | -1.193 | 1.422 | -0.0066 | ca |
| C42 | -4.415 | -2.318 | 2.116 | -0.0099 | ca |
| C43 | -3.732 | -3.306 | 1.422 | 0.0046  | ca |
| C44 | -2.832 | -4.104 | 2.116 | -0.0189 | ca |
| C45 | -1.768 | -4.662 | 1.421 | 0.0096  | ca |
| C46 | -0.600 | -4.951 | 2.115 | -0.0234 | ca |
| C47 | 0.602  | -4.950 | 1.421 | 0.0107  | ca |
| C48 | 1.769  | -4.663 | 2.115 | -0.0231 | ca |
| C49 | 2.833  | -4.104 | 1.421 | 0.0092  | ca |
| C50 | 3.734  | -3.307 | 2.115 | -0.0179 | ca |
| C51 | 4.416  | -2.317 | 1.421 | 0.0034  | ca |
| C52 | 4.843  | -1.193 | 2.115 | -0.0083 | ca |
| C53 | 4.987  | 0.000  | 4.196 | 0.0024  | ca |
| C54 | 4.842  | 1.194  | 3.502 | -0.0134 | ca |
| C55 | 4.415  | 2.318  | 4.197 | 0.0127  | ca |
| C56 | 3.732  | 3.307  | 3.503 | -0.0214 | ca |
| C57 | 2.833  | 4.104  | 4.197 | 0.0192  | ca |
| C58 | 1.768  | 4.663  | 3.503 | -0.0261 | ca |
| C59 | 0.601  | 4.951  | 4.197 | 0.0211  | ca |
| C60 | -0.601 | 4.951  | 3.504 | -0.0273 | ca |
| C61 | -1.768 | 4.663  | 4.198 | 0.0210  | ca |
| C62 | -2.833 | 4.104  | 3.504 | -0.0257 | ca |
| C63 | -3.732 | 3.307  | 4.198 | 0.0185  | ca |
| C64 | -4.415 | 2.317  | 3.504 | -0.0205 | ca |
| C65 | -4.841 | 1.193  | 4.198 | 0.0115  | ca |
| C66 | -4.986 | 0.000  | 3.504 | -0.0121 | ca |
| C67 | -4.841 | -1.194 | 4.198 | 0.0010  | ca |
| C68 | -4.414 | -2.318 | 3.503 | -0.0024 | ca |
| C69 | -3.731 | -3.307 | 4.197 | -0.0085 | ca |
| C70 | -2.832 | -4.104 | 3.503 | 0.0065  | ca |
| C71 | -1.767 | -4.663 | 4.197 | -0.0141 | ca |
| C72 | -0.600 | -4.950 | 3.502 | 0.0116  | ca |
| C73 | 0.602  | -4.951 | 4.196 | -0.0157 | ca |
| C74 | 1.769  | -4.663 | 3.502 | 0.0112  | ca |
| C75 | 2.834  | -4.104 | 4.196 | -0.0136 | ca |
| C76 | 3.733  | -3.306 | 3.502 | 0.0054  | ca |
| C77 | 4.416  | -2.317 | 4.196 | -0.0075 | ca |

|      |        |        |       |         |    |
|------|--------|--------|-------|---------|----|
| C78  | 4.842  | -1.193 | 3.502 | -0.0037 | ca |
| C79  | 4.987  | 0.000  | 5.584 | -0.0064 | ca |
| C80  | 4.842  | 1.194  | 6.278 | -0.0008 | ca |
| C81  | 4.416  | 2.318  | 5.584 | -0.0197 | ca |
| C82  | 3.733  | 3.307  | 6.278 | 0.0145  | ca |
| C83  | 2.833  | 4.105  | 5.584 | -0.0322 | ca |
| C84  | 1.768  | 4.663  | 6.279 | 0.0299  | ca |
| C85  | 0.601  | 4.951  | 5.585 | -0.0399 | ca |
| C86  | -0.601 | 4.950  | 6.279 | 0.0363  | ca |
| C87  | -1.768 | 4.663  | 5.585 | -0.0393 | ca |
| C88  | -2.832 | 4.104  | 6.279 | 0.0283  | ca |
| C89  | -3.733 | 3.307  | 5.585 | -0.0307 | ca |
| C90  | -4.415 | 2.317  | 6.279 | 0.0125  | ca |
| C91  | -4.841 | 1.193  | 5.585 | -0.0180 | ca |
| C92  | -4.985 | -0.001 | 6.279 | -0.0025 | ca |
| C93  | -4.841 | -1.194 | 5.585 | -0.0048 | ca |
| C94  | -4.414 | -2.318 | 6.279 | -0.0148 | ca |
| C95  | -3.731 | -3.308 | 5.584 | 0.0061  | ca |
| C96  | -2.831 | -4.104 | 6.278 | -0.0252 | ca |
| C97  | -1.767 | -4.664 | 5.584 | 0.0129  | ca |
| C98  | -0.600 | -4.951 | 6.278 | -0.0318 | ca |
| C99  | 0.603  | -4.951 | 5.583 | 0.0151  | ca |
| C100 | 1.770  | -4.663 | 6.277 | -0.0313 | ca |
| C101 | 2.834  | -4.104 | 5.583 | 0.0123  | ca |
| C102 | 3.734  | -3.307 | 6.277 | -0.0240 | ca |
| C103 | 4.417  | -2.317 | 5.583 | 0.0049  | ca |
| C104 | 4.842  | -1.193 | 6.277 | -0.0132 | ca |
| C105 | 4.975  | 0.000  | 8.361 | -0.0748 | ca |
| C106 | 4.827  | 1.190  | 7.665 | -0.0243 | ca |
| C107 | 4.405  | 2.312  | 8.362 | -0.1308 | ca |
| C108 | 3.722  | 3.297  | 7.665 | 0.0050  | ca |
| C109 | 2.826  | 4.094  | 8.362 | -0.1887 | ca |
| C110 | 1.763  | 4.649  | 7.666 | 0.0291  | ca |
| C111 | 0.600  | 4.938  | 8.362 | -0.2256 | ca |
| C112 | -0.599 | 4.935  | 7.666 | 0.0378  | ca |
| C113 | -1.763 | 4.651  | 8.363 | -0.2239 | ca |
| C114 | -2.823 | 4.091  | 7.666 | 0.0270  | ca |
| C115 | -3.722 | 3.298  | 8.363 | -0.1825 | ca |
| C116 | -4.401 | 2.310  | 7.666 | 0.0019  | ca |
| C117 | -4.828 | 1.190  | 8.363 | -0.1238 | ca |
| C118 | -4.970 | -0.001 | 7.666 | -0.0276 | ca |

|      |        |        |        |         |    |
|------|--------|--------|--------|---------|----|
| C119 | -4.828 | -1.191 | 8.363  | -0.0687 | ca |
| C120 | -4.400 | -2.311 | 7.666  | -0.0528 | ca |
| C121 | -3.721 | -3.300 | 8.362  | -0.0263 | ca |
| C122 | -2.822 | -4.092 | 7.665  | -0.0697 | ca |
| C123 | -1.762 | -4.652 | 8.362  | 0.0006  | ca |
| C124 | -0.597 | -4.936 | 7.665  | -0.0778 | ca |
| C125 | 0.602  | -4.939 | 8.361  | 0.0093  | ca |
| C126 | 1.765  | -4.649 | 7.664  | -0.0772 | ca |
| C127 | 2.828  | -4.094 | 8.361  | -0.0019 | ca |
| C128 | 3.723  | -3.297 | 7.664  | -0.0680 | ca |
| C129 | 4.406  | -2.312 | 8.361  | -0.0309 | ca |
| C130 | 4.828  | -1.190 | 7.664  | -0.0501 | ca |
| H131 | 4.727  | 1.166  | -1.744 | 0.1383  | ha |
| H132 | 3.644  | 3.230  | -1.744 | 0.1396  | ha |
| H133 | 1.726  | 4.553  | -1.744 | 0.1409  | ha |
| H134 | -0.588 | 4.834  | -1.743 | 0.1415  | ha |
| H135 | -2.767 | 4.008  | -1.743 | 0.1408  | ha |
| H136 | -4.313 | 2.264  | -1.743 | 0.1393  | ha |
| H137 | -4.870 | 0.001  | -1.743 | 0.1381  | ha |
| H138 | -4.312 | -2.262 | -1.743 | 0.1377  | ha |
| H139 | -2.766 | -4.006 | -1.744 | 0.1378  | ha |
| H140 | -0.586 | -4.833 | -1.744 | 0.1379  | ha |
| H141 | 1.727  | -4.552 | -1.745 | 0.1379  | ha |
| H142 | 3.645  | -3.228 | -1.745 | 0.1378  | ha |
| H143 | 4.728  | -1.164 | -1.745 | 0.1377  | ha |
| H144 | 4.870  | 0.000  | 9.443  | 0.1400  | ha |
| H145 | 4.312  | 2.263  | 9.443  | 0.1391  | ha |
| H146 | 2.767  | 4.007  | 9.444  | 0.1379  | ha |
| H147 | 0.588  | 4.834  | 9.444  | 0.1373  | ha |
| H148 | -1.726 | 4.553  | 9.445  | 0.1374  | ha |
| H149 | -3.643 | 3.228  | 9.445  | 0.1381  | ha |
| H150 | -4.726 | 1.164  | 9.445  | 0.1392  | ha |
| H151 | -4.726 | -1.166 | 9.445  | 0.1401  | ha |
| H152 | -3.642 | -3.230 | 9.444  | 0.1408  | ha |
| H153 | -1.724 | -4.554 | 9.443  | 0.1413  | ha |
| H154 | 0.589  | -4.835 | 9.443  | 0.1414  | ha |
| H155 | 2.768  | -4.008 | 9.443  | 0.1412  | ha |
| H156 | 4.313  | -2.263 | 9.443  | 0.1408  | ha |



### 3. *n*-butane

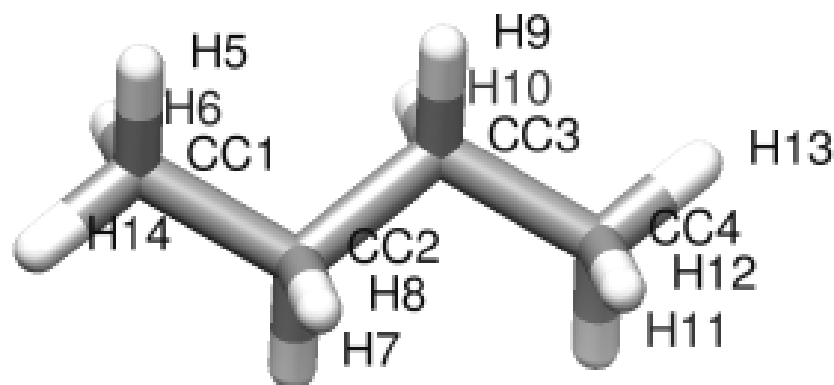

**Figure S4.** *n*-butane.

**Table S3.** Butane x,y,z coordinates, partial charges, and atom types.

| atom name | x (Å)  | y(Å)   | z(Å)  | partial charge | atom type |
|-----------|--------|--------|-------|----------------|-----------|
| CC1       | 0.453  | 0.002  | 2.486 | -0.0926        | c3        |
| CC2       | -0.434 | 0.003  | 3.739 | -0.0803        | c3        |
| CC3       | 0.434  | -0.002 | 5.004 | -0.0803        | c3        |
| CC4       | -0.453 | 0.001  | 6.257 | -0.0926        | c3        |
| H5        | 1.095  | 0.885  | 2.475 | 0.0322         | hc        |
| H6        | 1.085  | -0.888 | 2.470 | 0.0322         | hc        |
| H7        | -1.080 | -0.878 | 3.733 | 0.0382         | hc        |
| H8        | -1.074 | 0.888  | 3.736 | 0.0382         | hc        |
| H9        | 1.081  | 0.877  | 5.009 | 0.0382         | hc        |
| H10       | 1.073  | -0.888 | 5.008 | 0.0382         | hc        |
| H11       | -1.097 | -0.880 | 6.269 | 0.0322         | hc        |
| H12       | -1.083 | 0.893  | 6.273 | 0.0322         | hc        |
| H13       | 0.164  | -0.005 | 7.159 | 0.0321         | hc        |
| H14       | -0.164 | 0.008  | 1.584 | 0.0321         | hc        |

#### 4. *n*-hexane

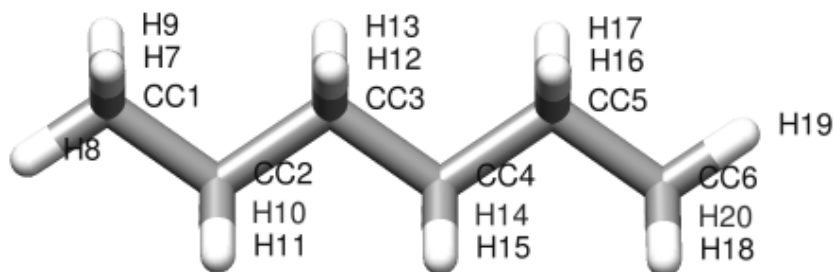

**Figure S5.** *n*-hexane.

**Table S4.** Hexane x,y,z coordinates, partial charges, and atom types.

| atom name | x (Å)  | y (Å)  | z (Å) | partial charge | atom type |
|-----------|--------|--------|-------|----------------|-----------|
| CC1       | -0.437 | 0.000  | 1.223 | -0.0925        | c3        |
| CC2       | 0.441  | -0.001 | 2.482 | -0.0800        | c3        |
| CC3       | -0.438 | 0.002  | 3.741 | -0.0793        | c3        |
| CC4       | 0.438  | -0.002 | 5.002 | -0.0794        | c3        |
| CC5       | -0.441 | 0.004  | 6.261 | -0.0800        | c3        |
| CC6       | 0.438  | 0.000  | 7.520 | -0.0925        | c3        |
| H7        | -1.076 | -0.885 | 1.206 | 0.0324         | hc        |
| H8        | 0.184  | -0.001 | 0.325 | 0.0323         | hc        |
| H9        | -1.072 | 0.889  | 1.205 | 0.0323         | hc        |
| H10       | 1.086  | 0.880  | 2.481 | 0.0383         | hc        |
| H11       | 1.081  | -0.886 | 2.482 | 0.0383         | hc        |
| H12       | -1.083 | -0.879 | 3.740 | 0.0392         | hc        |
| H13       | -1.077 | 0.887  | 3.741 | 0.0391         | hc        |
| H14       | 1.085  | 0.878  | 5.002 | 0.0391         | hc        |
| H15       | 1.076  | -0.888 | 5.003 | 0.0392         | hc        |
| H16       | -1.088 | -0.876 | 6.262 | 0.0383         | hc        |
| H17       | -1.078 | 0.891  | 6.261 | 0.0383         | hc        |
| H18       | 1.070  | -0.891 | 7.538 | 0.0324         | hc        |
| H19       | -0.183 | 0.004  | 8.418 | 0.0322         | hc        |
| H20       | 1.080  | 0.883  | 7.536 | 0.0323         | hc        |

## 5. *n*-tetracosane

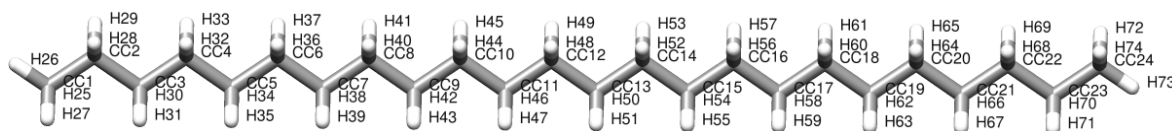

**Figure s6.** *n*-tetracosane.

**Table S5.** Tetracosane x,y,z coordinates, partial charges, and atom types

| atom name | x (Å)  | y(Å)   | z(Å)   | partial charge | atom type |
|-----------|--------|--------|--------|----------------|-----------|
| CC1       | 0.440  | 0.000  | -5.030 | -0.0925        | c3        |
| CC2       | -0.441 | 0.000  | -3.774 | -0.0801        | c3        |
| CC3       | 0.437  | -0.001 | -2.516 | -0.0793        | c3        |
| CC4       | -0.442 | 0.001  | -1.260 | -0.0790        | c3        |
| CC5       | 0.440  | -0.001 | -0.008 | -0.0790        | c3        |
| CC6       | -0.440 | 0.001  | 1.245  | -0.0789        | c3        |
| CC7       | 0.441  | -0.001 | 2.495  | -0.0790        | c3        |
| CC8       | -0.441 | 0.001  | 3.745  | -0.0790        | c3        |
| CC9       | 0.441  | -0.001 | 4.995  | -0.0790        | c3        |
| CC10      | -0.441 | 0.001  | 6.244  | -0.0790        | c3        |
| CC11      | 0.441  | -0.001 | 7.494  | -0.0790        | c3        |
| CC12      | -0.441 | 0.001  | 8.743  | -0.0790        | c3        |
| CC13      | 0.441  | -0.001 | 9.992  | -0.0790        | c3        |
| CC14      | -0.441 | 0.001  | 11.241 | -0.0790        | c3        |
| CC15      | 0.441  | -0.001 | 12.491 | -0.0790        | c3        |
| CC16      | -0.441 | 0.001  | 13.740 | -0.0790        | c3        |
| CC17      | 0.441  | -0.001 | 14.990 | -0.0790        | c3        |
| CC18      | -0.441 | 0.001  | 16.240 | -0.0790        | c3        |
| CC19      | 0.440  | -0.001 | 17.490 | -0.0790        | c3        |
| CC20      | -0.440 | 0.001  | 18.742 | -0.0790        | c3        |
| CC21      | 0.442  | -0.001 | 19.995 | -0.0790        | c3        |
| CC22      | -0.437 | 0.001  | 21.251 | -0.0793        | c3        |
| CC23      | 0.440  | -0.001 | 22.509 | -0.0801        | c3        |
| CC24      | -0.441 | 0.000  | 23.765 | -0.0925        | c3        |
| H25       | 1.077  | 0.887  | -5.044 | 0.0324         | hc        |
| H26       | -0.180 | 0.000  | -5.928 | 0.0323         | hc        |

|     |        |        |        |        |    |
|-----|--------|--------|--------|--------|----|
| H27 | 1.077  | -0.887 | -5.044 | 0.0324 | hc |
| H28 | -1.083 | -0.883 | -3.773 | 0.0383 | hc |
| H29 | -1.082 | 0.884  | -3.773 | 0.0383 | hc |
| H30 | 1.079  | 0.882  | -2.514 | 0.0394 | hc |
| H31 | 1.077  | -0.885 | -2.514 | 0.0394 | hc |
| H32 | -1.085 | -0.882 | -1.257 | 0.0393 | hc |
| H33 | -1.082 | 0.886  | -1.257 | 0.0393 | hc |
| H34 | 1.083  | 0.881  | -0.006 | 0.0394 | hc |
| H35 | 1.079  | -0.886 | -0.006 | 0.0394 | hc |
| H36 | -1.084 | -0.881 | 1.246  | 0.0395 | hc |
| H37 | -1.080 | 0.886  | 1.246  | 0.0394 | hc |
| H38 | 1.084  | 0.881  | 2.496  | 0.0395 | hc |
| H39 | 1.080  | -0.886 | 2.496  | 0.0394 | hc |
| H40 | -1.084 | -0.881 | 3.746  | 0.0395 | hc |
| H41 | -1.080 | 0.887  | 3.746  | 0.0395 | hc |
| H42 | 1.084  | 0.881  | 4.995  | 0.0395 | hc |
| H43 | 1.080  | -0.887 | 4.995  | 0.0395 | hc |
| H44 | -1.084 | -0.881 | 6.245  | 0.0395 | hc |
| H45 | -1.080 | 0.887  | 6.245  | 0.0395 | hc |
| H46 | 1.084  | 0.882  | 7.494  | 0.0395 | hc |
| H47 | 1.080  | -0.887 | 7.494  | 0.0395 | hc |
| H48 | -1.084 | -0.881 | 8.743  | 0.0395 | hc |
| H49 | -1.080 | 0.887  | 8.743  | 0.0395 | hc |
| H50 | 1.084  | 0.881  | 9.992  | 0.0395 | hc |
| H51 | 1.080  | -0.887 | 9.992  | 0.0395 | hc |
| H52 | -1.084 | -0.881 | 11.241 | 0.0395 | hc |
| H53 | -1.080 | 0.887  | 11.241 | 0.0395 | hc |
| H54 | 1.084  | 0.881  | 12.491 | 0.0395 | hc |
| H55 | 1.080  | -0.887 | 12.491 | 0.0395 | hc |
| H56 | -1.084 | -0.881 | 13.740 | 0.0395 | hc |
| H57 | -1.080 | 0.887  | 13.740 | 0.0395 | hc |
| H58 | 1.084  | 0.881  | 14.989 | 0.0395 | hc |
| H59 | 1.080  | -0.887 | 14.989 | 0.0395 | hc |
| H60 | -1.084 | -0.881 | 16.239 | 0.0394 | hc |
| H61 | -1.080 | 0.887  | 16.239 | 0.0395 | hc |
| H62 | 1.084  | 0.881  | 17.489 | 0.0395 | hc |
| H63 | 1.080  | -0.887 | 17.489 | 0.0394 | hc |
| H64 | -1.084 | -0.881 | 18.741 | 0.0394 | hc |
| H65 | -1.079 | 0.887  | 18.741 | 0.0394 | hc |
| H66 | 1.085  | 0.881  | 19.991 | 0.0393 | hc |
| H67 | 1.081  | -0.886 | 19.991 | 0.0393 | hc |

|     |        |        |        |        |    |
|-----|--------|--------|--------|--------|----|
| H68 | -1.081 | -0.881 | 21.248 | 0.0394 | hc |
| H69 | -1.076 | 0.886  | 21.249 | 0.0394 | hc |
| H70 | 1.084  | 0.881  | 22.508 | 0.0383 | hc |
| H71 | 1.080  | -0.886 | 22.508 | 0.0383 | hc |
| H72 | -1.075 | 0.889  | 23.780 | 0.0324 | hc |
| H73 | 0.180  | -0.003 | 24.663 | 0.0323 | hc |
| H74 | -1.081 | -0.885 | 23.778 | 0.0324 | hc |

## 6. Benzene

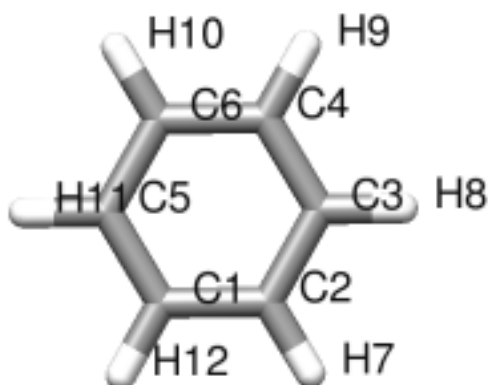

**Figure S7.** Benzene.

**Table S6.** Benzene x,y,z coordinates, partial charges, and atom types.

| atom name | x (Å)  | y (Å)  | z (Å) | partial charge | atom type |
|-----------|--------|--------|-------|----------------|-----------|
| C1        | -0.019 | -0.032 | 0.000 | -0.1301        | ca        |
| C2        | 1.369  | -0.032 | 0.000 | -0.1301        | ca        |
| C3        | 2.062  | 1.169  | 0.000 | -0.1301        | ca        |
| C4        | 1.369  | 2.370  | 0.000 | -0.1301        | ca        |
| C5        | -0.712 | 1.169  | 0.000 | -0.1301        | ca        |
| C6        | -0.019 | 2.370  | 0.000 | -0.1301        | ca        |
| H7        | 1.912  | -0.974 | 0.000 | 0.1301         | ha        |
| H8        | 3.149  | 1.169  | 0.000 | 0.1301         | ha        |
| H9        | 1.912  | 3.312  | 0.000 | 0.1301         | ha        |
| H10       | -0.562 | 3.312  | 0.000 | 0.1301         | ha        |
| H11       | -1.799 | 1.169  | 0.000 | 0.1301         | ha        |
| H12       | -0.562 | -0.974 | 0.000 | 0.1301         | ha        |

## References

1. J. M. Wang, R. M. Wolf, J. W. Caldwell, P. A. Kollman and D. A. Case "Development and testing of a general amber force field," *J. Comp. Chem.*, 2004, **25**, 1157-1174.
2. M. J. Frisch, G. W. Trucks, H. B. Schlegel, G. E. Scuseria, M. A. Robb, J. R. Cheeseman, J. A. Montgomery Jr., T. Vreven, K. N. Kudin, J. C. Burant, J. M. Millam, S. S. Iyengar, J. Tomasi, V. Barone, B. Mennucci, M. Cossi, G. Scalmani, N. Rega, G. A. Petersson, H. Nakatsuji, M. Hada, M. Ehara, K. Toyota, R. Fukuda, J. Hasegawa, M. Ishida, T. Nakajima, Y. Honda, O. Kitao, H. Nakai, M. Klene, X. Li, J. E. Knox, H. P. Hratchian, J. B. Cross, V. Bakken, C. Adamo, J. Jaramillo, R. Gomperts, R. E. Stratmann, O. Yazyev, A. J. Austin, R. Cammi, C. Pomelli, J. W. Ochterski, P. Y. Ayala, K. Morokuma, G. A. Voth, P. Salvador, J. J. Dannenberg, V. G. Zakrzewski, S. Dapprich, A. D. Daniels, M. C. Strain, O. Farkas, D. K. Malick, A. D. Rabuck, K. Raghavachari, J. B. Foresman, J. V. Ortiz, Q. Cui, A. G. Baboul, S. Clifford, J. Cioslowski, B. B. Stefanov, G. Liu, A. Liashenko, P. Piskorz, I. Komaromi, R. L. Martin, D. J. Fox, T. Keith, M. A. Al-Laham, C. Y. Peng, A. Nanayakkara, M. Challacombe, P. M. W. Gill, B. Johnson, W. Chen, M. W. Wong, C. Gonzalez and J. A. Pople, Gaussian, nc., Wallingford, CT, Editon edn., 2004.
3. W. D. Cornell, P. Cieplak, C. I. Bayly and P. A. Kollman "Application of RESP charges to calculate conformational energies, hydrogen bond energies, and free energies of solvation," *J. Am. Chem. Soc.*, 1993, **115**, 9620-9631.
4. D. A. Case, T. E. Cheatham III, T. Darden, H. Gohlke, R. Luo, K. M. Merz Jr., A. Onufriev, C. Simmerling, B. Wang and R. Woods "The Amber biomolecular simulation programs," *J. Computat. Chem.*, 2005, **26**, 1668-1688.
5. H. J. C. Berendsen, J. R. Grigera and T. P. Straatsma "The missing term in effective pair potentials," *J. Phys. Chem.*, 1987, **91**, 6269-6271.

6. M. P. Allen and D. J. Tildesley, *Computer simulation of liquids*, Oxford University Press, Oxford, UK, 1987.
